# Supplementary material
Source: Elsevier journal article supplement (https://researchonline.lshtm.ac.uk/2167249/1/mmc1.pdf)
Supplement: mmc1 [file mmc1.pdf]

LONDON  
SCHOOL of  
HYGIENE  
& TROPICAL  
MEDICINE

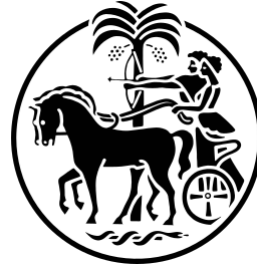

LSHTM Research Online

McDonald, HI; Thomas, SL; Millett, ER; Nitsch, D; (2015) CKD and the Risk of Acute, Community-Acquired Infections Among Older People With Diabetes Mellitus: A Retrospective Cohort Study Using Electronic Health Records. *American journal of kidney diseases*, 66 (1). pp. 60-8. ISSN 0272-6386 DOI: <https://doi.org/10.1053/j.ajkd.2014.11.027>

Downloaded from: <http://researchonline.lshtm.ac.uk/2167249/>

DOI: <https://doi.org/10.1053/j.ajkd.2014.11.027>

**Usage Guidelines:**

Please refer to usage guidelines at <https://researchonline.lshtm.ac.uk/policies.html> or alternatively contact [researchonline@lshtm.ac.uk](mailto:researchonline@lshtm.ac.uk).

Available under license: <http://creativecommons.org/licenses/by/2.5/>

<https://researchonline.lshtm.ac.uk>

**Table S1: Sensitivity analysis of the association between estimated glomerular filtration rate (eGFR) and infection incidence, using patients with eGFR 75-90 ml/min/1.73m<sup>2</sup> as the reference group**

|                                                 | eGFR ml/min/1.73m <sup>2</sup> | Number of infections | Rate ratio (95% confidence interval) <sup>a</sup> | P <sup>b</sup> |
|-------------------------------------------------|--------------------------------|----------------------|---------------------------------------------------|----------------|
| <b>Lower respiratory tract infection (LRTI)</b> |                                |                      |                                                   |                |
|                                                 | <15                            | 607                  | 1.48 (1.34–1.64)                                  | <0.001         |
|                                                 | 15-29                          | 5,153                | 1.18 (1.13–1.23)                                  |                |
|                                                 | 30-44                          | 16,557               | 1.08 (1.05–1.11)                                  |                |
|                                                 | 45-59                          | 29,783               | 1.03 (1.01–1.06)                                  |                |
|                                                 | 60-74                          | 31,538               | 1.00 (0.98–1.02)                                  |                |
|                                                 | 75-90                          | 24,110               | 1 (reference)                                     |                |
|                                                 | ≥90                            | 7,063                | 1.09 (1.06–1.13)                                  |                |
|                                                 | Total                          | 114,811              | —                                                 |                |
| <b>Pneumonia (subset of LRTI)</b>               |                                |                      |                                                   |                |
|                                                 | <15                            | 99                   | 2.97 (2.35–3.76)                                  | <0.001         |
|                                                 | 15-29                          | 650                  | 1.69 (1.51–1.88)                                  |                |
|                                                 | 30-44                          | 1,523                | 1.16 (1.07–1.27)                                  |                |
|                                                 | 45-59                          | 1,980                | 0.93 (0.86–1.00)                                  |                |
|                                                 | 60-74                          | 1,815                | 0.92 (0.85–0.99)                                  |                |
|                                                 | 75-90                          | 1,397                | 1 (reference)                                     |                |
|                                                 | ≥90                            | 387                  | 1.40 (1.24–1.58)                                  |                |
|                                                 | Total                          | 7,851                | —                                                 |                |
| <b>Sepsis</b>                                   |                                |                      |                                                   |                |
|                                                 | <15                            | 41                   | 5.72 (3.96–8.26)                                  | <0.001         |
|                                                 | 15-29                          | 186                  | 2.57 (2.09–3.15)                                  |                |
|                                                 | 30-44                          | 387                  | 1.55 (1.32–1.83)                                  |                |
|                                                 | 45-59                          | 499                  | 1.15 (0.99–1.33)                                  |                |
|                                                 | 60-74                          | 449                  | 1.03 (0.88–1.18)                                  |                |
|                                                 | 75-90                          | 324                  | 1 (reference)                                     |                |
|                                                 | ≥90                            | 87                   | 1.11 (0.87–1.42)                                  |                |
|                                                 | Total                          | 1,973                | —                                                 |                |

a. Adjusted for proteinuria (updated), age (updated), sex, socio-economic status by practice, financial year prior to or post 2004, ischaemic heart disease (updated), congestive cardiac failure (updated), hypertension (updated), cerebrovascular disease (updated), other dementia (updated), chronic lung disease (updated) and smoking (baseline).

b. Likelihood ratio test for inclusion of eGFR as a categorical variable in the model
